# Supplementary material
Source: PubMed Central journal article supplement (PMC6583563)
Supplement: jama-320-2087-s002.pdf [file jama-320-2087-s002.pdf]

## Supplementary Online Content

Wittekamp BH, Plantinga NL, Cooper BS, et al. Decontamination strategies and bloodstream infections with antibiotic-resistant microorganisms in ventilated patients: a randomized clinical trial. *JAMA*. doi:10.1001/jama.2018.13765

**eAppendix 1.** eMicrobiology Methods

**eAppendix 2.** Sample Size Calculation

**eFigure.** Proportion of Surveillance Samples Positive for Antibiotic-Resistant Gram-Negative Bacteria on Day 1-14 of ICU Admission (ESBL-Selective Media)

**eTable 1.** Characteristics of Participating Centers

**eTable 2.** Micro-organisms in Positive Blood Cultures That are Not Included in the Study Definition of ICU-Acquired Bloodstream Infection

**eTable 3.** Antibiotic Susceptibility Testing and Definition of Highly Resistant Micro-organism

**eTable 4.** Baseline Characteristics of Screened Population

**eTable 5.** All Baseline Characteristics (Study Population)

**eTable 6.** Compliance Measures

**eTable 7.** Average Hand Hygiene Compliance per Study Period

**eTable 8.** Incidence of ICU-Acquired Bloodstream Infection With Multidrug Resistant Gram-Negative Bacteria (Primary Outcome) per ICU

**eTable 9.** Systemic Antibiotics Used

**eTable 10.** Prevalence of Unit-Wide Carriage of Antibiotic Resistant Microorganisms in Rectum and Respiratory Tract (Complete Results)

**eTable 11.** Compliance With Antibiotic Susceptibility Testing in Point Prevalence Samples

**eTable 12.** Prevalence of Colistin-Resistant Gram-Negative Bacteria in 3 Monthly Point Prevalence Surveys (10/13 Centers)

**eTable 13.** Results of Sensitivity Analyses

**eTable 14.** Head-to-Head Comparisons Between Study Interventions; Primary and Secondary Outcomes

**eTable 15.** Results for Competing End Points for Primary and Secondary Outcomes

This supplementary material has been provided by the authors to give readers additional information about their work.

## List of investigators

**Bastiaan H Wittekamp**, MD, and **Nienke L Plantinga**, MD, University Medical Center Utrecht; **Ben S Cooper**, PhD, Nuffield Department of Clinical Medicine, University of Oxford; **Joaquin Lopez-Contreras** MD/PhD, Hospital de Sant Pau-Universitat Autònoma de Barcelona; Prof. **Pere Coll**, Hospital de Sant Pau-Universitat Autònoma de Barcelona; Prof. **Jordi Mancebo**, Hospital de Sant Pau-Universitat Autònoma de Barcelona; **Matt P Wise**, MD/PhD, University Hospital of Wales, Cardiff; **Matt PG Morgan**, MD/PhD, University Hospital of Wales, Cardiff; Prof. **Pieter Depuydt**, Ghent University Hospital; **Jerina Boelens**, MD/PhD, Ghent University Hospital; **Thierry Dugernier**, MD/PhD, Clinique Saint Pierre, Ottignies; **Valérie Verbelen**, PhD, Clinique Saint Pierre, Ottignies; Prof. **Philippe G Jorens**, Antwerp University Hospital, University of Antwerp; **Walter Verbrugghe**, MD, Antwerp University Hospital, University of Antwerp; Prof. **Surbhi Malhotra-Kumar**, University of Antwerp; Prof. **Pierre Damas**, CHU Liège; **Cécile Meex**, PhD, CHU Liège; **Kris Leleu**, MD, AZ Sint Jan Bruges; **Anne-Marie van den Abeele**, MD, Saint-Lucas Hospital Ghent; **Francisco Esteves**, MD, Centro Hospitalar de Trás-os-Montes os Montes e Alto Douro, Vila Real; **Ana Filipa Gomes Pimenta de Matos**, MSc, Centro Hospitalar de Trás-os-Montes os Montes e Alto Douro, Vila Real; Prof. **A. Torres**, Hospital Clinic of Barcelona; **Sara Fernández Méndez**, MD, Hospital Clinic of Barcelona; **Andrea Vergara Gomez**, Msc, Hospital Clinic of Barcelona; **Viktorija Tomic**, MD/ PhD, University Clinic of Respiratory and Allergic Diseases, Golnik; **Franc Sifrer**, MD, University Clinic of Respiratory and Allergic Diseases Golnik; **Esther Villarreal Tello**, MD, Hospital Universitario La Fe, Valencia; **Jesus Ruiz Ramos**, PhD, Hospital Universitario La Fe, Valencia; **Irene Aragao**, MD, Hospital Santo Antonio - Centro Hospitalar do Porto (CHP); **Claudia Santos**, MD, Hospital Santo Antonio - Centro Hospitalar do Porto (CHP); **Roberta HM Sperring**; Msc, Azienda Ospedaliera San Camillo Forlanini, Rome; **Patrizia Coppadoro**, BSc, Azienda Ospedaliera San Camillo Forlanini, Rome; **Giuseppe Nardi**, MD, Ospedale Infermi RIMINI – AUSL della Romagna; Prof. **Christian Brun-Buisson**, CHU Henri Mondor & Univ. Paris Est Créteil, Paris; Prof. **Marc J.M. Bonten**, University Medical Center Utrecht.

## **eAppendix 1. eMicrobiology Methods**

### **Surveillance cultures**

Twice weekly (Monday/Thursday) rectum and respiratory surveillance samples were collected from study patients and inoculated on ESBL-selective agar (chromID, bioMérieux). Species determination and antibiotic susceptibility testing were performed according to local protocols, with a minimum common set of antibiotics tested for GNB ([Supplementary eTable 2](#)). Five centers used automated antibiotic susceptibility testing (AST), five relied on disk diffusion and three used both methods ([Supplementary eTable 1](#)). Colistin testing was performed at least once per species per tractus (rectum or respiratory) per patient, by automatic testing in five centers and by E-testing (bioMérieux) in eleven centers; three centers used both approaches.

### **Point prevalence cultures**

Rectal swabs and respiratory tract secretions were obtained for point prevalence surveys once monthly, from all patients present in the unit on that day, and inoculated on ESBL- (both samples), VRE- (rectal swabs) and MRSA-selective agar (respiratory tract samples, all chromID, bioMérieux). Growing isolates were processed using the laboratory procedures described above. Once every three months, these samples were also inoculated on plain MacConkey agar, from which a maximum of three morphologically distinct colonies were selected for species determination (MALDI-TOF, Bruker) and automated susceptibility testing (BD Phoenix, BD Diagnostic Systems) at the University Medical Center Utrecht to determine the prevalence of colistin susceptibility among GNB isolated from non-selective media ([Supplementary eTable 11](#)).

### **Clinical cultures**

Results from clinical respiratory and blood samples were collected for all study patients. These samples were processed according to local microbiological procedures.

## **eAppendix 2. Sample Size Calculation**

The sample size calculation in the study protocol states that “to demonstrate a 10% relative difference in 28-day mortality for each intervention, 10,800 patients were required (using a baseline 28-day mortality of 27.5%, alpha 0.05, beta 0.80), including a margin of 600 patients per study arm to include cluster-effects and differences in baseline characteristics. The required sample size to detect a 50% reduction of ICU-acquired BSI due to MDRGNB for each intervention (from a baseline incidence of 1.4%) was 6,700.”

In fact, a power of 80% instead of a beta of 0.80 was used. .

It was discovered – after study completion - that an error had occurred in the calculation of variance between study groups in the formula which led to lower patient numbers than required. This mistake was partly attenuated by the higher mortality rate observed in the baseline period.

The ICC was determined with the final data with the R-package ICCbin (rm method) and yielded a value of 0.001.

The funding for this study was obtained from a call text that specifically asked for evaluation of interventions in ICU that could reduce the incidence of ICU-acquired BSI. We, therefore, designed our study with this primary endpoint, but decided to power the study on mortality, as this is the more clinically relevant endpoint.

**eFigure.** Proportion of Surveillance Samples Positive for Antibiotic-Resistant Gram-Negative Bacteria on Day 1-14 of ICU Admission (ESBL-Selective Media)

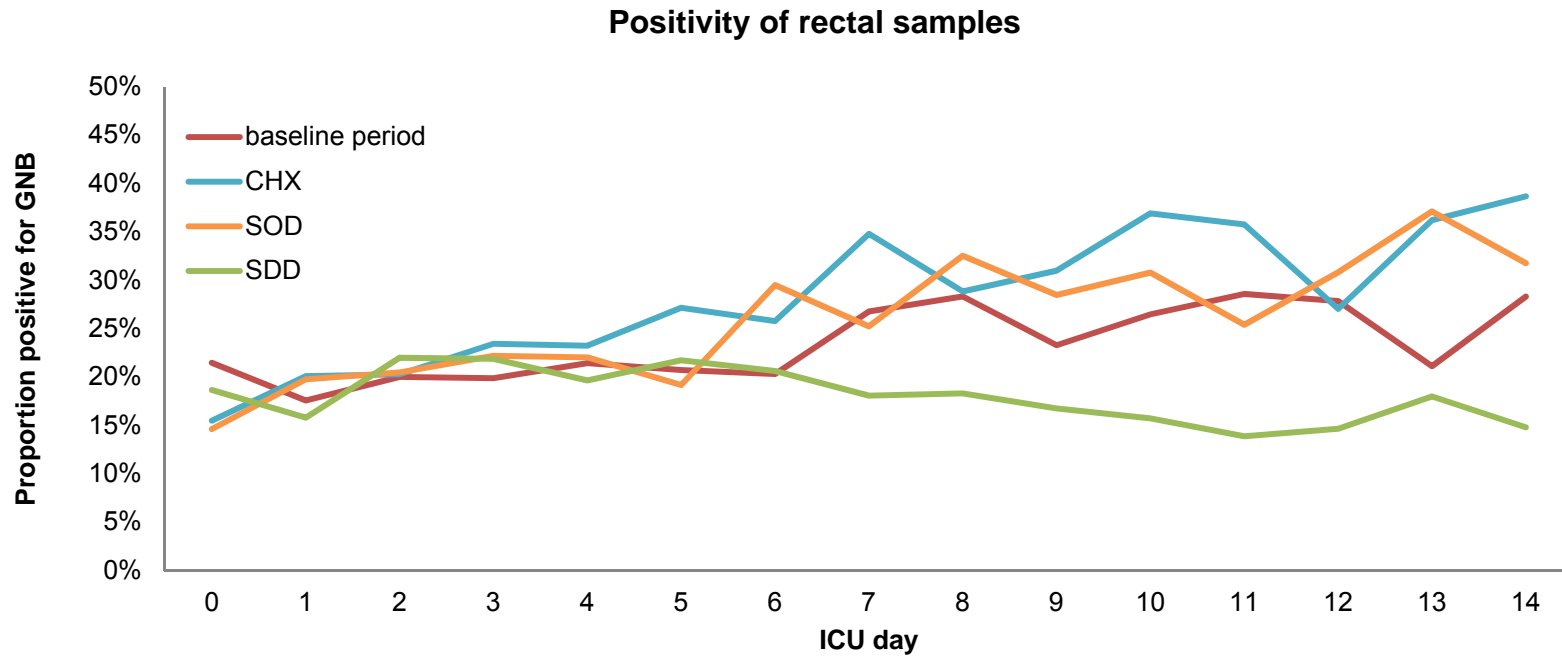

**No. of rectum samples**

|                 |     |     |     |     |     |     |     |     |     |     |     |     |     |     |     |
|-----------------|-----|-----|-----|-----|-----|-----|-----|-----|-----|-----|-----|-----|-----|-----|-----|
| baseline period | 275 | 558 | 465 | 438 | 378 | 396 | 345 | 299 | 279 | 232 | 238 | 196 | 212 | 180 | 159 |
| CHX             | 239 | 458 | 444 | 444 | 366 | 361 | 322 | 299 | 281 | 226 | 225 | 179 | 185 | 174 | 163 |
| SOD             | 178 | 476 | 474 | 469 | 368 | 381 | 373 | 341 | 246 | 246 | 234 | 197 | 185 | 186 | 148 |
| SDD             | 236 | 437 | 446 | 430 | 382 | 304 | 359 | 321 | 246 | 227 | 229 | 202 | 157 | 178 | 169 |

**eFigure (continued).** Proportion of Surveillance Samples Positive for Antibiotic-Resistant Gram-Negative Bacteria on Day 1-14 of ICU Admission (ESBL-Selective Media)

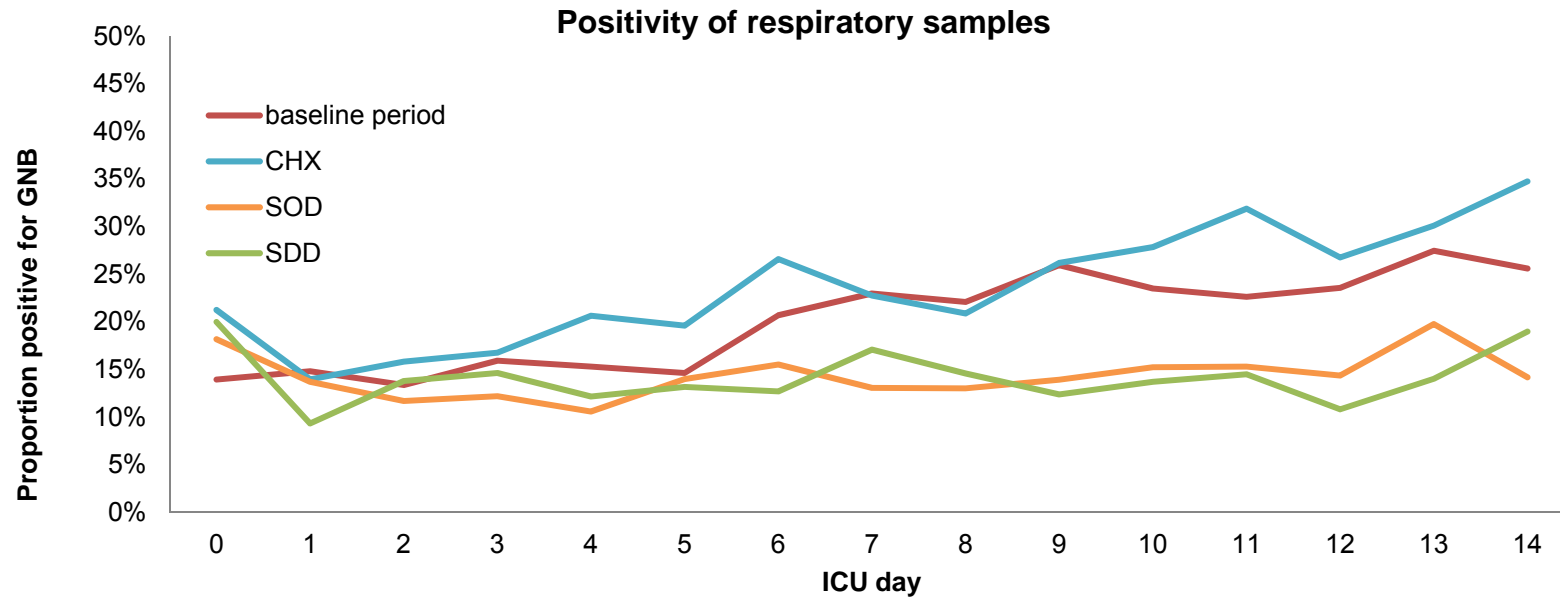

**No. of respiratory samples**

|                 |     |     |     |     |     |     |     |     |     |     |     |     |     |     |     |
|-----------------|-----|-----|-----|-----|-----|-----|-----|-----|-----|-----|-----|-----|-----|-----|-----|
| baseline period | 251 | 560 | 471 | 458 | 379 | 396 | 338 | 287 | 276 | 235 | 234 | 190 | 212 | 182 | 164 |
| CHX             | 207 | 458 | 455 | 447 | 368 | 362 | 327 | 303 | 268 | 229 | 219 | 185 | 183 | 176 | 164 |
| SOD             | 187 | 481 | 487 | 459 | 368 | 357 | 354 | 329 | 238 | 244 | 223 | 196 | 174 | 177 | 148 |
| SDD             | 210 | 439 | 435 | 437 | 386 | 296 | 354 | 316 | 240 | 218 | 226 | 200 | 157 | 171 | 158 |

**eTable 1.** Characteristics of Participating Centers

| ICU              | Country | no. of beds | Type of ICU (medical/surgical/mixed) | CHX oral care in standard care | Standard care (study period 1) |                                  | Randomization sequence (order of study periods) |               |         | No. of patients included (% of screened) | prevalence of colonization with 3GC-R Enterobacteriaceae in rectum (standard care) | susceptibility testing GNB surveillance cultures |                 |
|------------------|---------|-------------|--------------------------------------|--------------------------------|--------------------------------|----------------------------------|-------------------------------------------------|---------------|---------|------------------------------------------|------------------------------------------------------------------------------------|--------------------------------------------------|-----------------|
|                  |         |             |                                      |                                | Start date                     | Duration (months) <sup>(d)</sup> | 2                                               | 3             | 4       |                                          |                                                                                    | disk diffusion                                   | automated       |
| 1 <sup>(a)</sup> | BE      | 36          | mixed                                | 0.12%                          | 01-Dec-2013                    | 6                                | CHX (5.6)                                       | SOD (6)       | SDD (6) | 900 (14.9%)                              | 19.0%                                                                              | x                                                |                 |
| 2 <sup>(a)</sup> | BE      | 24          | mixed                                | 0.20%                          | 01-Jan-2014                    | 6                                | CHX (4.6)                                       | SDD (6)       | SOD (6) | 317 (12.8%)                              | 13.6%                                                                              |                                                  | phoenix         |
| 3                | SL      | 12          | medical                              | none                           | 06-Jan-2014                    | 6                                | SOD (6)                                         | SDD (6)       | CHX (6) | 168 (22.0%)                              | 7.5%                                                                               | x                                                |                 |
| 4                | BE      | 42          | mixed                                | 0.20%                          | 01-Mar-2014                    | 6                                | SDD (7)                                         | CHX (6)       | SOD(6)  | 1231 (19.4%)                             | 7.2%                                                                               | x                                                |                 |
| 5                | SP      | 30          | mixed                                | 0.12%                          | 14-Apr-2014                    | 6                                | SOD (8.5)                                       | CHX (6)       | SDD (6) | 1043 (32.7%)                             | 30.0%                                                                              | x                                                | sensititre      |
| 6                | IT      | 12          | mixed                                | 0.20%                          | 15-May-2014                    | 6                                | SDD (6)                                         | SOD (3.5+2.5) | CHX (6) | 598 (76.4%)                              | 23.2%                                                                              | x                                                | vitek / phoenix |
| 7                | PT      | 10          | mixed                                | 0.12%                          | 01-Jun-2014                    | 14.5                             | SDD (6)                                         | CHX (6)       | SOD (6) | 639 <sup>(b)</sup>                       | 5.7%                                                                               |                                                  | vitek/microscan |
| 8                | BE      | 15          | mixed                                | 0.20%                          | 01-Jul-2014                    | 6                                | SOD (6)                                         | SDD (6)       | CHX (6) | 337 (20.9%)                              | 15.2%                                                                              | x                                                | vitek           |
| 9                | BE      | 42          | mixed                                | 0.20%                          | 01-Sep-2014                    | 6                                | CHX (6)                                         | SOD (5)       | SDD (6) | 1297 (28.0%)                             | 18.8%                                                                              |                                                  | vitek           |
| 10               | SP      | 24          | medical                              | 0.12%                          | 01-Nov-2014                    | 8                                | SDD (6)                                         | SOD (6)       | CHX (6) | 375 (18.3%)                              | 35.2%                                                                              | x                                                |                 |
| 11               | SP      | 8           | mixed                                | 0.12%                          | 03-Nov-2014                    | 9                                | CHX (6)                                         | SDD (5)       | SOD (6) | 237 (23.1%)                              | 11.3%                                                                              |                                                  | phoenix         |
| 12               | UK      | 22          | mixed                                | none                           | 11-Jan-2015                    | 8                                | SOD (6)                                         | CHX (6)       | SDD (6) | 1109 (44.1%)                             | 8.9%                                                                               | x                                                |                 |
| 13               | PT      | 9           | mixed                                | 0.20%                          | 19-Jan-2015                    | 7                                | SDD (6)                                         | SOD (6)       | CHX (6) | 414 (53.1%)                              | 0.0% <sup>(c)</sup>                                                                |                                                  | microscan       |



## **eTable 1. Characteristics of Participating Centers**

Abbreviations: 3GC-R, resistance to third generation cephalosporins (Cefotaxime or Ceftriaxone or Ceftazidime); BE, Belgium; CHX, chlorhexidine mouthwash; GNB, Gram-negative bacteria; IT, Italy; PT, Portugal; SL, Slovenia; SP, Spain; UK, United Kingdom; SDD, selective digestive tract decontamination; SOD, selective oropharyngeal decontamination.

- a) Oral mucosal lesions occurred during the CHX study period with CHX 2% concentration, which was replaced by CHX 1% for the remainder of the study.
- b) Only excluded patients with point prevalence data were registered as part of the screened population.
- c) 31/31 rectal samples were negative for 3GC-R; in the respiratory tract the prevalence of 3GC-R Enterobacteriaceae was 2/31 (6.5%).
- d) In some ICUs, the baseline period was extended pending authorization to conduct the trial.

**eTable 2.** Micro-organisms in Positive Blood Cultures That are Not Included in the Study Definition of ICU-Acquired Bloodstream Infection

| Study period<br>Number of patients                            | Baseline<br>n=2251           |         | CHX<br>n=2108                |         | SOD<br>n=2224                |         | SDD<br>n=2082                |         |
|---------------------------------------------------------------|------------------------------|---------|------------------------------|---------|------------------------------|---------|------------------------------|---------|
|                                                               | No. of episodes <sup>a</sup> | Column% |
| <b>Other ICU-acquired positive blood cultures<sup>b</sup></b> | <b>106</b>                   |         | <b>136</b>                   |         | <b>142</b>                   |         | <b>148</b>                   |         |
| Coagulase negative staphylococcus spp.                        | 97                           | 91.5%   | 117                          | 86.0%   | 127                          | 89.4%   | 135                          | 91.2%   |
| Clostridium spp.                                              | 0                            | 0.0%    | 1                            | 0.7%    | 1                            | 0.7%    | 1                            | 0.7%    |
| Non-pneumococcal streptococcus spp.                           | 5                            | 4.7%    | 13                           | 9.6%    | 8                            | 5.6%    | 8                            | 5.4%    |
| Micrococcus spp.                                              | 0                            | 0.0%    | 0                            | 0.0%    | 2                            | 1.4%    | 1                            | 0.7%    |
| Other                                                         | 4                            | 3.8%    | 5                            | 3.7%    | 4                            | 2.8%    | 3                            | 2.0%    |

**Abbreviations:** BSI, Bloodstream infection; CHX, chlorhexidine mouthwash; ICU, intensive care unit; SDD, selective digestive tract decontamination; SOD, selective oropharyngeal decontamination; spp., species.

a) First occurrence of unique species on day 2 of ICU admission onwards.

b) Excluding species considered contaminants (Bacillus, Atopobium, Corynebacterium and Propionibacterium species).

**eTable 3.** Antibiotic Susceptibility Testing and Definition of Highly Resistant Micro-organism

| Minimum required antibiotic susceptibility testing list             | HRMO criteria <sup>a</sup> |
|---------------------------------------------------------------------|----------------------------|
| <b>Multidrug resistant Gram-negative bacteria (primary outcome)</b> |                            |
| <b>Enterobacteriaceae</b>                                           |                            |
| Imipenem or Meropenem                                               | <b>A</b>                   |
| Colistin (for species other than naturally resistant)*              | <b>A*</b>                  |
| Cefotaxime or Ceftriaxone or Ceftazidime                            | <b>A and B****</b>         |
| Ciprofloxacin**                                                     | <b>B</b>                   |
| Gentamicin                                                          | <b>B</b>                   |
| Amikacin                                                            | <b>B</b>                   |
| Piperacillin or Pip/tazobactam                                      | <b>B</b>                   |
| Trimethoprim-Sulfamethoxazole                                       | <b>B</b>                   |
| <b>Glucose non-fermenting Gram-negative bacteria</b>                |                            |
| Imipenem or Meropenem or Doripenem                                  | <b>A***</b>                |
| Colistin                                                            | <b>A</b>                   |
| Ceftazidime                                                         | <b>B</b>                   |
| Ciprofloxacin**                                                     | <b>B</b>                   |
| Gentamicin                                                          | <b>B</b>                   |
| Amikacin                                                            | <b>B</b>                   |
| Piperacillin or Pip/tazobactam or Ticarcillin                       | <b>B</b>                   |
| <b>MDRGNB regardless of susceptibility testing result</b>           |                            |
| <i>Stenotrophomonas spp.</i>                                        |                            |
| <i>Achromobacter spp.</i>                                           |                            |
| <i>Burkholderia spp.</i>                                            |                            |
| <b>Gram-positive HRMO</b>                                           |                            |
| Methicillin-resistant <i>S. aureus</i> (MRSA)                       |                            |
| Vancomycin resistant <i>E.faecium/E.faecalis</i> (VRE)              |                            |

Abbreviations: HRMO highly resistant micro-organism; spp. Species.

a) Modified from: A.P. Magiorakos et al., Multidrug-resistant, extensively drug-resistant and pandrug-resistant bacteria: an international expert proposal for interim standard definitions for acquired resistance, Clinical Microbiology and Infection, April 2011.

A Intermediate/resistant result for an antibacterial agent from any one of the indicated groups of this category is sufficient to define the micro-organism as HRMO.

B Intermediate/resistant result for antibacterial agents from at least three of the indicated groups in this category is required to define the micro-organism as HRMO.

\* Except intrinsically resistant *Proteus spp.*, *Providencia spp.*, *Morganella spp.*, *Serratia spp.* and *H. alvei*; these species are defined as a HRMO when they meet resistance criteria for the other antibiotics listed.

\*\* Result from ofloxacin or levofloxacin was used as alternative if ciprofloxacin was not available.

\*\*\* For *Pseudomonas aeruginosa*, resistance to one of the other antibiotic groups was necessary to be reported as carbapenem resistant HRMO.

\*\*\*\* Resistance to third-generation cephalosporins directly qualified for HRMO and was counted as one of three antibiotic classes for criterion B.

**eTable 4.** Baseline Characteristics of Screened Population

|                                     | <b>baseline</b> | <b>CHX</b>   | <b>SOD</b>   | <b>SDD</b>   |
|-------------------------------------|-----------------|--------------|--------------|--------------|
|                                     | <b>8106</b>     | <b>7898</b>  | <b>8407</b>  | <b>8522</b>  |
| ICU admission in prior 30 days      | 356 (4.4%)      | 442 (5.6%)   | 441 (5.2%)   | 493 (5.8%)   |
| Age (mean, SD)                      | 61.3 (17.7)     | 60.7 (18.6)  | 61.3 (18.1)  | 60.9 (18.6)  |
| Sex (male)                          | 4996 (61.6%)    | 4928 (62.4%) | 5238 (62.3%) | 5264 (61.8%) |
| APACHE II (mean, SD) - 5 hospitals* | 16.1 (7.9)      | 15.4 (7.6)   | 16.3 (7.9)   | 16.6 (8.0)   |
| SAPS II (mean, SD) - 8 hospitals**  | 42.4 (18.6)     | 43.3 (18.9)  | 43.8 (18.9)  | 43.8 (18.7)  |
| ICU-LOS (median, IQR)               | 4 [2 – 7]       | 4 [2 – 7]    | 4 [3-7]      | 4 [2-7]      |

**Abbreviations:** CHX, chlorhexidine mouthwash; ICU, intensive care unit; LOS, length of stay (days); SD, standard deviation; SDD, selective digestive tract decontamination; SOD, selective oropharyngeal decontamination.

\* 137 missing values.

\*\* 2306 missing values (within these selected hospitals).

**eTable 5.** All Baseline Characteristics (Study Population)

|                                                                        | baseline     | CHX          | SOD          | SDD          |
|------------------------------------------------------------------------|--------------|--------------|--------------|--------------|
|                                                                        | n = 2251     | n = 2108     | n = 2224     | n = 2082     |
| ICU admission in prior 30 days <i>with inclusion</i>                   | 45 (2.0%)    | 41 (1.9%)    | 39 (1.8%)    | 44 (2.1%)    |
| Age (mean, SD)                                                         | 62.0 (15.6)  | 61.4 (15.7)  | 61.6 (15.7)  | 62.8 (15.5)  |
| Male gender (%)                                                        | 1420 (63.1%) | 1358 (64.4%) | 1439 (64.7%) | 1344 (64.6%) |
| APACHE II (mean, SD) - 5 hospitals                                     | 20.3 (8.6)   | 19.8 (8.2)   | 20.5 (9.3)   | 21.8 (8.7)   |
| SAPS II (mean, SD) - 8 hospitals                                       | 53.0 (18.0)  | 54.8 (17.9)  | 54.4 (17.5)  | 55.0 (18.0)  |
| Type of ICU-admission                                                  |              |              |              |              |
| medical                                                                | 1464 (65.3%) | 1323 (63.0%) | 1442 (64.9%) | 1385 (66.6%) |
| trauma with surgery                                                    | 138 (6.2%)   | 142 (6.8%)   | 156 (7.0%)   | 115 (5.5%)   |
| trauma, no surgery                                                     | 113 (5.0%)   | 88 (4.2%)    | 104 (4.7%)   | 88 (4.2%)    |
| surgical, scheduled                                                    | 198 (8.8%)   | 173 (8.2%)   | 173 (7.8%)   | 178 (8.6%)   |
| surgical, unscheduled                                                  | 328 (14.6%)  | 374 (17.8%)  | 346 (15.6%)  | 314 (15.1%)  |
| surgical, unspecified                                                  | 10 (0.4%)    | 8 (0.4%)     | 3 (0.1%)     | 2 (0.1%)     |
| Location before ICU admission                                          |              |              |              |              |
| Same hospital                                                          | 1020 (45.3%) | 1032 (49.0%) | 1025 (46.1%) | 1035 (49.7%) |
| Another hospital or long term care facility                            | 400 (17.8%)  | 312 (14.8%)  | 316 (14.2%)  | 301 (14.5%)  |
| Home (directly or via emergency room)                                  | 831 (36.9%)  | 764 (36.2%)  | 883 (39.7%)  | 746 (35.8%)  |
| If admitted from a hospital or long-term care facility, prior location |              |              |              |              |
| Operating room                                                         | 379 (27.1%)  | 409 (30.9%)  | 371 (28.4%)  | 360 (27.8%)  |
| Other ICU                                                              | 229 (16.4%)  | 221 (16.7%)  | 221 (16.9%)  | 176 (13.6%)  |

|                                                                                             | <b>baseline</b> | <b>CHX</b>      | <b>SOD</b>      | <b>SDD</b>      |
|---------------------------------------------------------------------------------------------|-----------------|-----------------|-----------------|-----------------|
| <i>continued</i>                                                                            | <b>n = 2251</b> | <b>n = 2108</b> | <b>n = 2224</b> | <b>n = 2082</b> |
| If admitted from a hospital or long-term care facility, prior location ( <i>continued</i> ) |                 |                 |                 |                 |
| Acute care ward                                                                             | 726 (52.0%)     | 656 (49.5%)     | 642 (49.1%)     | 710 (54.8%)     |
| Rehabilitation or long term care facility                                                   | 63 (4.5%)       | 38 (2.9%)       | 74 (5.7%)       | 49 (3.8%)       |
| Antibiotic at the time of ICU admission                                                     | 943 (41.9%)     | 832 (39.5%)     | 992 (44.6%)     | 744 (35.8%)     |
| Acute illness on ICU-admission                                                              | 1999 (88.9%)    | 1888 (89.6%)    | 2007 (90.2%)    | 1932 (92.8%)    |
| Sites of organ failure                                                                      |                 |                 |                 |                 |
| Respiratory illness                                                                         | 1023 (45.5%)    | 990 (47.0%)     | 998 (44.9%)     | 985 (47.3%)     |
| Cardiovascular illness                                                                      | 828 (36.8%)     | 811 (38.5%)     | 835 (37.5%)     | 792 (38.0%)     |
| Neurologic illness                                                                          | 686 (30.5%)     | 674 (32.0%)     | 615 (27.7%)     | 603 (29.0%)     |
| Renal illness                                                                               | 232 (10.3%)     | 203 (9.6%)      | 220 (9.9%)      | 201 (9.7%)      |
| Hepatic illness                                                                             | 148 (6.6%)      | 122 (5.8%)      | 124 (5.6%)      | 104 (5.0%)      |
| Metabolic illness                                                                           | 128 (5.7%)      | 146 (6.9%)      | 145 (6.5%)      | 106 (5.1%)      |
| Hematologic illness                                                                         | 135 (6.0%)      | 111 (5.3%)      | 155 (7.0%)      | 109 (5.2%)      |
| Other illness                                                                               | 210 (9.3%)      | 253 (12.0%)     | 345 (15.5%)     | 344 (16.5%)     |
| Charlson comorbidity Index (mean, SD)                                                       | 2.15 (2.42)     | 2.38 (2.49)     | 2.35 (2.42)     | 2.42 (2.56)     |
| Charlson comorbidity Index (categories)                                                     |                 |                 |                 |                 |
| 0                                                                                           | 738 (32.8%)     | 631 (29.9%)     | 653 (29.4%)     | 626 (30.1%)     |
| 1-2                                                                                         | 759 (33.7%)     | 674 (32.0%)     | 718 (32.3%)     | 654 (31.4%)     |
| 3-4                                                                                         | 399 (17.7%)     | 398 (18.9%)     | 461 (20.7%)     | 410 (19.7%)     |
| >4                                                                                          | 355 (15.8%)     | 405 (19.2%)     | 392 (17.6%)     | 392 (18.8%)     |

|                                                      | <b>baseline</b> | <b>CHX</b>      | <b>SOD</b>      | <b>SDD</b>      |
|------------------------------------------------------|-----------------|-----------------|-----------------|-----------------|
| <i>continued</i>                                     | <b>n = 2251</b> | <b>n = 2108</b> | <b>n = 2224</b> | <b>n = 2082</b> |
| Comorbidities                                        |                 |                 |                 |                 |
| Any malignancy (incl. leukemia and lymphoma)         | 319 (14.2%)     | 296 (14.0%)     | 329 (14.8%)     | 289 (13.9%)     |
| Metastatic solid tumor                               | 108 (4.8%)      | 129 (6.1%)      | 104 (4.7%)      | 143 (6.9%)      |
| Hematologic cancer                                   | 71 (3.2%)       | 66 (3.1%)       | 80 (3.6%)       | 61 (2.9%)       |
| Immunodepression (incl. steroids / immunesupression) | 190 (8.4%)      | 223 (10.6%)     | 193 (8.7%)      | 206 (9.9%)      |
| Periferal vascular disease                           | 260 (11.6%)     | 254 (12.0%)     | 262 (11.8%)     | 325 (15.6%)     |
| Myocardial infarction                                | 232 (10.3%)     | 230 (10.9%)     | 219 (9.8%)      | 209 (10.0%)     |
| Cerebrovascular disease                              | 225 (10.0%)     | 200 (9.5%)      | 177 (8.0%)      | 199 (9.6%)      |
| Congestive heart failure                             | 340 (15.1%)     | 425 (20.2%)     | 469 (21.1%)     | 443 (21.3%)     |
| Pulmonary disease / chronic respiratory failure      | 384 (17.1%)     | 398 (18.9%)     | 400 (18.0%)     | 395 (19.0%)     |
| DM without chronic complication                      | 269 (12.0%)     | 298 (14.1%)     | 251 (11.3%)     | 280 (13.4%)     |
| DM with chronic complication                         | 187 (8.3%)      | 147 (7.0%)      | 180 (8.1%)      | 148 (7.1%)      |
| Chronic renal failure                                | 257 (11.4%)     | 278 (13.2%)     | 337 (15.2%)     | 303 (14.6%)     |
| Peptic ulcer disease                                 | 139 (6.2%)      | 168 (8.0%)      | 189 (8.5%)      | 145 (7.0%)      |
| Dementia                                             | 43 (1.9%)       | 52 (2.5%)       | 54 (2.4%)       | 55 (2.6%)       |
| Hemiplegia / paraplegia                              | 50 (2.2%)       | 47 (2.2%)       | 56 (2.5%)       | 53 (2.5%)       |
| Moderate / Severe liver disease                      | 132 (5.9%)      | 124 (5.9%)      | 119 (5.4%)      | 88 (4.2%)       |
| Mild liver disease                                   | 56 (2.5%)       | 87 (4.1%)       | 58 (2.6%)       | 67 (3.2%)       |
| Rheumatologic disease                                | 63 (2.8%)       | 102 (4.8%)      | 91 (4.1%)       | 76 (3.7%)       |
| AIDS/HIV infection                                   | 20 (0.9%)       | 17 (0.8%)       | 29 (1.3%)       | 21 (1.0%)       |

Abbreviations: AIDS/HIV, acquired immunodeficiency syndrome/human immunodeficiency virus; CHX, chlorhexidine mouthwash; DM, diabetes mellitus; ICU, intensive care unit; incl., including; SD, standard deviation; SDD, selective digestive tract decontamination; SOD, selective oropharyngeal decontamination.



**eTable 6. Compliance Measures**

|                                                                                                                                 | CHX             | SOD             | SDD             |
|---------------------------------------------------------------------------------------------------------------------------------|-----------------|-----------------|-----------------|
| <b>Protocol compliance (monthly unit-wide point prevalence screening)</b>                                                       |                 |                 |                 |
| Patients admitted                                                                                                               | 1667            | 1693            | 1588            |
| Ventilated (% of admitted) - <i>representing % eligible</i>                                                                     | 722 (43.1%)     | 708 (41.8%)     | 640 (40.3%)     |
| Included                                                                                                                        | 693             | 682             | 604             |
| Patient received 4 doses of study intervention in past 24h (% of included)                                                      | 641 (92.5%)     | 630 (92.4%)     | 569 (94.2%)     |
| <b>Treatment compliance (amongst included patients)</b>                                                                         | <b>n = 2108</b> | <b>n = 2224</b> | <b>n = 2082</b> |
| Treatment compliance (% of included)                                                                                            |                 |                 |                 |
| Intervention interrupted for more than > 24h (4 gifts or more) before extubation                                                | 54 (2.6%)       | 82 (3.7%)       | 100 (4.8%)      |
| Type of medication interrupted                                                                                                  |                 |                 |                 |
| CHX                                                                                                                             | 54 (2.6%)       | 2 (0.1%)        | 0 (0.0%)        |
| SOD                                                                                                                             | 0 (0.0%)        | 75 (3.4%)       | 0 (0.0%)        |
| SDD, paste only                                                                                                                 | 0 (0.0%)        | 0 (0.0%)        | 13 (0.6%)       |
| SDD, suspension only                                                                                                            | 0 (0.0%)        | 1 (0.0%)        | 54 (2.6%)       |
| SDD, both paste and suspension                                                                                                  | 0 (0.0%)        | 2 (0.1%)        | 33 (1.6%)       |
| Duration of interruption                                                                                                        |                 |                 |                 |
| 1-3 days                                                                                                                        | 28 (1.3%)       | 47 (2.1%)       | 58 (2.8%)       |
| 4-7 days                                                                                                                        | 17 (0.8%)       | 25 (1.1%)       | 30 (1.4%)       |
| 8-14 days                                                                                                                       | 1 (0.0%)        | 2 (0.1%)        | 7 (0.3%)        |
| 15 days or more                                                                                                                 | 1 (0.0%)        | 4 (0.2%)        | 2 (0.1%)        |
| Reason for interruption                                                                                                         |                 |                 |                 |
| Allergy                                                                                                                         | 0 (0.0%)        | 1 (0.0%)        | 0 (0.0%)        |
| Intolerance                                                                                                                     | 15 (0.7%)       | 2 (0.1%)        | 1 (0.0%)        |
| Colonization with HRMO, only sensitive to colistin                                                                              | 0 (0.0%)        | 1 (0.0%)        | 0 (0.0%)        |
| Colonization with HRMO, that is resistant to carbapenems <i>and</i> tobramycin (or if tobramycin was not tested, to gentamicin) | 0 (0.0%)        | 0 (0.0%)        | 0 (0.0%)        |
| Gastrointestinal contra-indication                                                                                              | 2 (0.1%)        | 0 (0.0%)        | 33 (1.6%)       |
| Doctor's decision                                                                                                               | 4 (0.2%)        | 17 (0.8%)       | 8 (0.4%)        |
| Patient's (or proxy) decision                                                                                                   | 10 (0.5%)       | 4 (0.2%)        | 10 (0.5%)       |

Abbreviations: CHX, chlorhexidine mouthwash; HRMO, highly resistant micro-organism; SDD, selective digestive tract decontamination; SOD, selective oropharyngeal decontamination.

**eTable 7.** Average Hand Hygiene Compliance per Study Period

| Center         | Baseline period | CHX   | SOD   | SDD   |
|----------------|-----------------|-------|-------|-------|
| ICU1           | 45.3%           | 59.1% | 60.3% | 54.7% |
| ICU2           | 66.0%           | 74.8% | 66.2% | 66.3% |
| ICU3           | 76.2%           | 80.7% | 71.9% | 78.8% |
| ICU4           | 67.0%           | 71.2% | 74.1% | 76.1% |
| ICU5           | 61.4%           | 70.3% | 75.0% | 73.7% |
| ICU6           | 74.1%           | 73.3% | 64.2% | 75.2% |
| ICU7           | 64.9%           | 86.5% | 93.6% | 65.0% |
| ICU8           | 66.3%           | 70.4% | 70.3% | 74.6% |
| ICU9           | 61.1%           | 70.3% | 75.5% | 64.3% |
| ICU10          | 58.4%           | 72.7% | 70.6% | 65.0% |
| ICU11          | 61.7%           | 67.3% | 74.0% | 76.6% |
| ICU12          | 32.6%           | 61.7% | 48.7% | 78.0% |
| ICU13          | 86.5%           | 86.4% | 91.1% | 87.7% |
| <b>Overall</b> | 64.1%           | 72.4% | 72.5% | 72.2% |

Abbreviations: CHX, chlorhexidine mouthwash; SDD, selective digestive tract decontamination; SOD, selective oropharyngeal decontamination.

**eTable 8.** Incidence of ICU-Acquired Bloodstream Infection With Multidrug Resistant Gram-Negative Bacteria (Primary Outcome) per ICU <sup>a</sup>

| Centre       | baseline    |                  | CHX         |                  | SOD         |                  | SDD         |                  | Total       |                   |
|--------------|-------------|------------------|-------------|------------------|-------------|------------------|-------------|------------------|-------------|-------------------|
|              | n           | incidence n (%)   |
| ICU1         | 212         | 4 (1.9%)         | 214         | 7 (3.3%)         | 245         | 2 (0.8%)         | 2 (229)     | 0.9%             | 900         | 15 (1.7%)         |
| ICU2         | 77          | 1 (1.3%)         | 59          | 0 (0.0%)         | 101         | 3 (3.0%)         | 2 (80)      | 2.5%             | 317         | 6 (1.9%)          |
| ICU3         | 45          | 0 (0.0%)         | 46          | 0 (0.0%)         | 36          | 0 (0.0%)         | 0 (41)      | 0.0%             | 168         | 0 (0.0%)          |
| ICU4         | 266         | 0 (0.0%)         | 285         | 0 (0.0%)         | 334         | 0 (0.0%)         | 0 (346)     | 0.0%             | 1231        | 0 (0.0%)          |
| ICU5         | 169         | 4 (2.4%)         | 277         | 4 (1.4%)         | 349         | 3 (0.9%)         | 2 (248)     | 0.8%             | 1043        | 13 (1.3%)         |
| ICU6         | 122         | 9 (7.4%)         | 177         | 7 (4.0%)         | 155         | 8 (5.2%)         | 3 (144)     | 2.1%             | 598         | 27 (4.5%)         |
| ICU7         | 297         | 0 (0.0%)         | 109         | 1 (0.9%)         | 104         | 1 (1.0%)         | 1 (129)     | 0.8%             | 639         | 3 (0.5%)          |
| ICU8         | 85          | 2 (2.4%)         | 92          | 2 (2.2%)         | 85          | 0 (0.0%)         | 0 (75)      | 0.0%             | 337         | 4 (1.2%)          |
| ICU9         | 333         | 9 (2.7%)         | 338         | 11 (3.3%)        | 309         | 8 (2.6%)         | 8 (317)     | 2.5%             | 1297        | 36 (2.8%)         |
| ICU10        | 113         | 8 (7.1%)         | 85          | 1 (1.2%)         | 85          | 7 (8.2%)         | 6 (92)      | 6.5%             | 375         | 22 (5.9%)         |
| ICU11        | 63          | 1 (1.6%)         | 50          | 2 (4.0%)         | 70          | 0 (0.0%)         | 1 (54)      | 1.9%             | 237         | 4 (1.7%)          |
| ICU12        | 352         | 6 (1.7%)         | 272         | 2 (0.7%)         | 248         | 0 (0.0%)         | 1 (237)     | 0.4%             | 1109        | 9 (0.8%)          |
| ICU13        | 117         | 3 (2.6%)         | 104         | 1 (1.0%)         | 103         | 1 (1.0%)         | 0 (90)      | 0.0%             | 414         | 5 (1.2%)          |
| <b>Total</b> | <b>2251</b> | <b>47 (2.1%)</b> | <b>2108</b> | <b>38 (1.8%)</b> | <b>2224</b> | <b>33 (1.5%)</b> | <b>2082</b> | <b>26 (1.2%)</b> | <b>8665</b> | <b>144 (1.7%)</b> |

**Abbreviations:** CHX, chlorhexidine; n, number of inclusions; SDD, selective digestive tract decontamination; SOD, selective oropharyngeal decontamination.

a) Incidence refers to the number of patients with an ICU-acquired bloodstream infection with multidrug resistant Gram-negative bacteria (n=144); there were 154 unique episodes

**eTable 9. Systemic Antibiotics Used<sup>a</sup>**

| <b>Study period</b>                                 | <b>Baseline</b> | <b>CHX</b>   | <b>SOD</b>   | <b>SDD</b>   |
|-----------------------------------------------------|-----------------|--------------|--------------|--------------|
| % Patient days included                             | 54%             | 56%          | 54%          | 52%          |
| <b>Antibiotic type (DDD per 1,000 patient days)</b> |                 |              |              |              |
| Penicillin + beta-lactamase inhibitor               | 402             | 355          | 371          | 422          |
| Cephalosporins                                      | 176             | 160          | 180          | 188          |
| Carbapenems                                         | 179             | 177          | 172          | 186          |
| Fluoroquinolones                                    | 104             | 99           | 85           | 94           |
| Aminoglycosides                                     | 30              | 26           | 24           | 23           |
| Colistin                                            | 24              | 25           | 38           | 36           |
| Tetracyclins                                        | 9               | 16           | 25           | 15           |
| Macrolides                                          | 53              | 54           | 58           | 68           |
| Lincosamides                                        | 25              | 22           | 23           | 23           |
| Others                                              | 56              | 66           | 54           | 60           |
| <b>Total</b>                                        | <b>1,058</b>    | <b>1,000</b> | <b>1,030</b> | <b>1,115</b> |

**Abbreviations:** CHX, chlorhexidine mouthwash; DDD, defined daily dose; SDD, selective digestive tract decontamination; SOD, selective oropharyngeal decontamination.

a) Secondary exploratory analysis

**eTable 10.** Prevalence of Unit-Wide Carriage of Antibiotic Resistant Microorganisms in Rectum and Respiratory Tract (Complete Results)

|                                                                             | baseline     | CHX          |                         | SOD          |                         | SDD          |                         |
|-----------------------------------------------------------------------------|--------------|--------------|-------------------------|--------------|-------------------------|--------------|-------------------------|
| Rectum                                                                      | prev.        | prev.        | aRR <sup>a</sup>        | prev.        | aRR <sup>a</sup>        | prev.        | aRR <sup>a</sup>        |
| <u>HRMO Enterobacteriaceae</u>                                              | 16.1%        | 21.7%        | 1.07 (0.99-1.16)        | 19.7%        | 1.04 (0.96-1.13)        | 13.9%        | 1.05 (0.95-1.16)        |
| third-generation cephalosporin resistance                                   | 15.8%        | 21.5%        | 1.07 (0.99-1.16)        | 19.2%        | 1.04 (0.96-1.13)        | 13.7%        | 1.07 (0.97-1.18)        |
| carbapenem resistance                                                       | 3.2%         | 3.1%         | 0.68 (0.54-0.86)        | 2.9%         | 0.85 (0.71-1.03)        | 2.6%         | 0.80 (0.64-1.01)        |
| resistance to ≥3 antibiotics (or classes)                                   | 10.8%        | 15.5%        | 1.07 (0.97-1.19)        | 14.2%        | 1.06 (0.96-1.17)        | 10.0%        | 1.10 (0.97-1.24)        |
| colistin resistance <sup>b</sup>                                            | 0.5%         | 1.6%         | 0.81 (0.54-1.21)        | 1.8%         | 0.97 (0.65-1.45)        | 1.3%         | 0.96 (0.60-1.54)        |
| <u>HRMO Glucose non-fermenting GNB</u>                                      | 3.2%         | 3.2%         | 0.77 (0.62-0.95)        | 3.3%         | 0.93 (0.76-1.14)        | 2.3%         | 0.81 (0.63-1.04)        |
| carbapenem resistance <sup>c</sup>                                          | 2.9%         | 2.9%         | 0.75 (0.60-0.93)        | 2.7%         | 0.95 (0.76-1.18)        | 1.8%         | 0.80 (0.60-1.06)        |
| colistin resistance                                                         | 0.0%         | 0.1%         |                         | 0.1%         |                         | 0.3%         |                         |
| resistance to ≥3 antibiotics (or classes)                                   | 2.4%         | 2.0%         | 0.66 (0.50-0.89)        | 2.7%         | 0.82 (0.65-1.05)        | 1.7%         | 0.71 (0.52-0.98)        |
| MDRGNB, regardless of antibiotic susceptibility                             | 1.0%         | 1.5%         | 0.80 (0.50-1.27)        | 1.1%         | 0.80 (0.49-1.30)        | 1.6%         | 1.01 (0.64-1.58)        |
| <b>Any MDRGNB (aggregate)</b>                                               | <b>19.3%</b> | <b>25.3%</b> | <b>1.03 (0.96-1.11)</b> | <b>23.0%</b> | <b>1.03 (0.96-1.11)</b> | <b>17.1%</b> | <b>1.04 (0.96-1.14)</b> |
| <u>VRE</u>                                                                  | 2.2%         | 1.5%         | 0.96 (0.74-1.24)        | 1.8%         | 0.94 (0.73-1.21)        | 4.2%         | 1.03 (0.84-1.27)        |
| <i>Enterobacteriaceae or GNF-GNB with gentamicin resistance<sup>d</sup></i> | 8.3%         | 9.0%         | 0.95 (0.84-1.08)        | 10.4%        | 0.99 (0.89-1.10)        | 7.2%         | 1.00 (0.87-1.15)        |

**eTable 10.** Prevalence of Unit-Wide Carriage of Antibiotic Resistant Microorganisms in Rectum and Respiratory Tract (Complete Results) (continued)

|                                                                                            | baseline     | CHX          |                         | SOD          |                         | SDD          |                         |
|--------------------------------------------------------------------------------------------|--------------|--------------|-------------------------|--------------|-------------------------|--------------|-------------------------|
| Respiratory tract                                                                          | prev.        | prev.        | aRR <sup>a</sup>        | prev.        | aRR <sup>a</sup>        | prev.        | aRR <sup>a</sup>        |
| <u>HRMO Enterobacteriaceae</u>                                                             | 6.6%         | 7.6%         | 0.94 (0.81-1.09)        | 4.2%         | 0.93 (0.80-1.09)        | 4.7%         | 0.94 (0.78-1.13)        |
| third-generation cephalosporin resistance                                                  | 6.4%         | 7.4%         | 0.95 (0.82-1.10)        | 4.2%         | 0.93 (0.80-1.09)        | 4.5%         | 0.94 (0.78-1.13)        |
| carbapenem resistance                                                                      | 1.4%         | 1.1%         | 0.71 (0.47-1.07)        | 0.9%         | 0.68 (0.48-0.94)        | 0.5%         | 0.59 (0.37-0.97)        |
| resistance to ≥3 antibiotics (or classes)                                                  | 4.0%         | 5.2%         | 1.02 (0.84-1.23)        | 3.3%         | 0.92 (0.76-1.12)        | 3.5%         | 1.04 (0.83-1.31)        |
| colistin resistance <sup>b</sup>                                                           | 0.1%         | 0.8%         | 0.57 (0.29-1.14)        | 0.9%         | 0.66 (0.36-1.21)        | 0.3%         | 0.61 (0.30-1.22)        |
| <u>HRMO Glucose non-fermenting GNB</u>                                                     | 3.4%         | 2.9%         | 0.80 (0.64-1.00)        | 3.8%         | 0.84 (0.70-1.00)        | 2.7%         | 0.75 (0.58-0.96)        |
| carbapenem resistance <sup>c</sup>                                                         | 3.1%         | 2.8%         | 0.80 (0.63-1.00)        | 3.4%         | 0.83 (0.69-1.00)        | 2.4%         | 0.80 (0.62-1.04)        |
| colistin resistance                                                                        | 0.3%         | 0.0%         |                         | 0.1%         |                         | 0.2%         |                         |
| MDR                                                                                        | 2.5%         | 1.7%         | 0.75 (0.55-1.01)        | 2.6%         | 0.83 (0.67-1.03)        | 2.2%         | 0.76 (0.57-1.01)        |
| MDRGNB, regardless of antibiotic susceptibility                                            | 3.8%         | 5.2%         | 1.16 (0.94-1.44)        | 3.2%         | 0.97 (0.77-1.22)        | 3.6%         | 1.04 (0.83-1.31)        |
| <b>Any MDRGNB (aggregate)</b>                                                              | <b>12.9%</b> | <b>15.2%</b> | <b>0.98 (0.88-1.08)</b> | <b>10.3%</b> | <b>0.93 (0.84-1.04)</b> | <b>10.2%</b> | <b>0.94 (0.83-1.06)</b> |
| <u>MRSA</u>                                                                                | 1.7%         | 1.1%         | 0.95 (0.66-1.36)        | 1.3%         | 0.77 (0.59-1.00)        | 1.7%         | 0.73 (0.54-0.97)        |
| <i>Enterobacteriaceae</i> or <i>GNF-GNB</i> with <i>gentamicin</i> resistance <sup>d</sup> | 4.5%         | 4.3%         | 0.84 (0.69-1.02)        | 4.4%         | 0.86 (0.72-1.02)        | 4.0%         | 0.85 (0.68-1.06)        |

**Abbreviations:** aRR; adjusted relative risk per month; CHX, chlorhexidine; GNB, Gram-negative bacteria; HRMO, highly resistant micro-organism; MDRGNB, multidrug resistant Gram-negative bacteria (resistance to 3 or more antibiotics/classes of antibiotics [(Supplementary eTable 2)]; MRSA, methicillin resistant *S. aureus*; SDD, selective digestive decontamination; SOD, selective oropharyngeal decontamination; VRE, vancomycin-resistant *E. faecium*/*E. faecalis*.

a) all models were corrected for underlying time trends per center.

b) excluding Enterobacteriaceae with intrinsic colistin resistance (*Proteus* spp., *Morganella* spp., *Serratia* spp., *Providencia* spp., *Hafnia alvei*).

c) for *Pseudomonas* spp., resistance to at least one other antibiotic was required to be reported as carbapenem-R.

d) these were not part of the definition of HRMO.

**eTable 11.** Compliance With Antibiotic Susceptibility Testing in Point Prevalence Samples

|                                                        | Rectum       |         | Respiratory tract |         |
|--------------------------------------------------------|--------------|---------|-------------------|---------|
|                                                        | EB           | GNF-GNB | EB                | GNF-GNB |
| Number of unique micro-organisms                       | 1,153        | 467     | 559               | 399     |
| <b>Antibiotics for which AST was requested</b>         |              |         |                   |         |
| colistin                                               | 96.9%        | 93.8%   | 97.3%             | 92.0%   |
| meropenem or imipenem                                  | 98.0%        | n/a     | 98.0%             | n/a     |
| meropenem or imipenem or doripenem                     | n/a          | 97.2%   | n/a               | 94.0%   |
| piperacillin or piperacillin/tazobactam                | 97.9%        | n/a     | 98.7%             | n/a     |
| piperacillin or piperacillin/tazobactam or ticarcillin | n/a          | 95.9%   | n/a               | 89.2%   |
| cefotaxim or ceftriaxone or ceftazidime                | 98.0%        | n/a     | 98.6%             | n/a     |
| ceftazidime                                            | n/a          | 95.9%   | n/a               | 89.0%   |
| gentamicin                                             | 97.2%        | 97.0%   | 98.4%             | 93.5%   |
| amikacin                                               | 98.0%        | 97.4%   | 98.7%             | 93.7%   |
| fluoroquinolone                                        | 98.2%        | 97.2%   | 98.7%             | 94.0%   |
| sulfamethoxazole/trimethoprim                          | 97.7%        | n/a     | 98.2%             | n/a     |
| no. of AST results missing                             | 204          | 119     | 69                | 218     |
| no. of AST results expected                            | 9183         | 3736    | 4362              | 3192    |
| Completeness of AST                                    | 97.8%        | 96.8%   | 98.4%             | 93.2%   |
| <b>Completeness of AST per tractus</b>                 | <b>97.5%</b> |         | <b>96.2%</b>      |         |

Abbreviations: AST, antibiotic susceptibility testing; EB Enterobacteriaceae; GNF-GNB Glucose non-fermenting Gram-negative bacteria (including Pseudomonas spp.); no., number.



**eTable 12.** Prevalence of Colistin-Resistant Gram-Negative Bacteria in 3 Monthly Point Prevalence Surveys (10/13 Centers)

|                                                                                                       | baseline    | CHX         | SOD         | SDD         |
|-------------------------------------------------------------------------------------------------------|-------------|-------------|-------------|-------------|
| No. of point prevalence surveys                                                                       | 19          | 19          | 18          | 22          |
| <b>Number of point prevalence samples</b>                                                             |             |             |             |             |
| Rectum                                                                                                | 360         | 409         | 354         | 402         |
| Respiratory tract                                                                                     | 360         | 396         | 337         | 377         |
| <b>Colonization with GNB</b>                                                                          |             |             |             |             |
| Rectum                                                                                                | 256 (71.1%) | 289 (70.7%) | 253 (71.5%) | 245 (60.9%) |
| Respiratory tract                                                                                     | 112 (31.1%) | 146 (36.9%) | 85 (25.2%)  | 105 (27.9%) |
| <b>Colonization with colistin-R GNB (excl. intrinsically colistin resistant species <sup>a</sup>)</b> |             |             |             |             |
| Rectum                                                                                                | 4 (1.1%)    | 3 (0.7%)    | 8 (2.0%)    | 8 (2.3%)    |
| Respiratory tract                                                                                     | 1 (0.2%)    | 3 (0.8%)    | 3 (0.9%)    | 0 (0.0%)    |
| <b>Colonization with <i>intrinsically</i> colistin-R GNB <sup>a</sup></b>                             |             |             |             |             |
| Rectum                                                                                                | 38 (10.6%)  | 43 (10.5%)  | 24 (6.8%)   | 36 (9.0%)   |
| Respiratory tract                                                                                     | 20 (5.6%)   | 23 (5.8%)   | 13 (3.9%)   | 23 (6.1%)   |

**Abbreviations:** CHX, chlorhexidine mouthwash; GNB, Gram-negative bacteria; no., number; SDD, selective digestive tract decontamination; SOD, selective oropharyngeal decontamination.

**Methods:** The use of the colistin E-test in eleven hospitals (see supplementary microbiological methods) might have underestimated the prevalence of colistin resistance during monthly point prevalence surveys. Therefore, once every three months, rectum and respiratory samples obtained during point prevalence surveys were inoculated on plain MacConkey agar from which a maximum of three morphologically distinct colonies were selected in the local laboratory. These isolates were shipped to the University Medical Center of Utrecht for species determination (MALDI-TOF, Bruker) and automated susceptibility testing (BD Phoenix, BD) to determine the prevalence of colistin susceptibility among GNB isolated from non-selective media.

<sup>a</sup> intrinsically colistin resistant species included *Proteus* spp., *Morganella* spp., *Serratia* spp., *Providencia* spp., *Hafnia alvei*.

**eTable 13. Results of Sensitivity Analyses**

**A) Post-hoc sensitivity analysis on the effects of SDD on mortality <sup>a</sup>**

|                                  | <b>Results from adjusted analysis <sup>b</sup></b> |
|----------------------------------|----------------------------------------------------|
|                                  | <b>SDD vs. baseline</b>                            |
| ICU mortality (aHR, 95% CI)      | 0.93 (0.79-1.08)                                   |
| Hospital mortality (aHR, 95% CI) | 0.93 (0.79-1.10)                                   |
| 28-day mortality (aOR, 95% CI)   | 1.01 (0.78-1.29)                                   |

**Abbreviations:** aHR, adjusted hazard ratio; aOR, adjusted odds ratio; CI, confidence interval; ICU, intensive care unit; SDD, selective digestive decontamination.

a) In this analysis all SDD-treated patients with ICU-acquired BSI caused by a pathogen susceptible to third-generation cephalosporins during the first four days and/or with ICU-acquired BSI with any pathogen in the absence of mechanical ventilation, were considered alive at all mortality endpoints.

b) all models accounted for clustering using a fixed effect on ICU and a random effect on study period (13 ICUs x 4 study periods) and were adjusted for age, gender, the Charlson comorbidity index, APACHE II or SAPS II score, admission type, antibiotic use on ICU admission, location before ICU admission (in both propensity score and final models) and mean hand hygiene compliance per study period (only in final models).

**B) A prior sensitivity analysis: Effects of interventions on mortality, excluding patients with ICU-LOS <3 days.**

|                                  | <b>Results from adjusted analysis <sup>a</sup></b> |                         |                         |
|----------------------------------|----------------------------------------------------|-------------------------|-------------------------|
|                                  | <b>CHX vs. baseline</b>                            | <b>SOD vs. baseline</b> | <b>SDD vs. baseline</b> |
| ICU mortality (aHR, 95% CI)      | 1.09 (0.96-1.24)                                   | 1.04 (0.92-1.19)        | 0.99 (0.84-1.15)        |
| Hospital mortality (aHR, 95% CI) | 0.99 (0.86-1.15)                                   | 1.02 (0.89-1.17)        | 0.98 (0.84-1.15)        |
| 28-day mortality (aOR, 95% CI)   | 1.08 (0.87-1.35)                                   | 1.06 (0.86-1.32)        | 1.04 (0.81-1.34)        |

**Abbreviations:** aHR, adjusted hazard ratio; aOR, adjusted odds ratio; CHX, chlorhexidine; CI, confidence interval; HR, hazard ratio; ICU, intensive care unit; OR, odds ratio; SDD, selective digestive decontamination; SOD, selective oropharyngeal decontamination.

a) all models accounted for clustering using a fixed effect on ICU and a random effect on study period (13 ICUs x 4 study periods) and were adjusted for age, gender, the Charlson comorbidity index, APACHE II or SAPS II score, admission type, antibiotic use on ICU admission, location before ICU admission (in both propensity score and final models) and mean hand hygiene compliance per study period (only in final models).

**eTable 14.** Head-to-Head Comparisons Between Study Interventions; Primary and Secondary Outcomes

|                                                           | SDD vs. CHX      | SOD vs. CHX      | SDD vs. SOD      |
|-----------------------------------------------------------|------------------|------------------|------------------|
| Primary outcome <sup>(a)</sup>                            |                  |                  |                  |
| ICU-acquired BSI with MDRGNB (aHR, 95% CI) <sup>(b)</sup> | 0.62 (0.39-0.98) | 0.79 (0.53-1.17) | 0.79 (0.52-1.19) |
| Secondary outcomes <sup>(a)</sup>                         |                  |                  |                  |
| ICU-acquired BSI with HRMO (aHR, 95% CI)                  | 0.72 (0.43-1.19) | 0.78 (0.55-1.10) | 0.92 (0.57-1.48) |
| ICU-acquired BSI with any pathogen (aHR, 95% CI)          | 0.73 (0.57-0.93) | 0.87 (0.75-1.00) | 0.84 (0.67-1.05) |
| Mortality in ICU (aHR, 95% CI)                            | 0.92 (0.82-1.02) | 0.97 (0.90-1.05) | 0.94 (0.84-1.06) |
| Mortality in hospital (aHR, 95% CI)                       | 0.99 (0.90-1.08) | 1.03 (0.95-1.12) | 0.96 (0.87-1.06) |
| Mortality at 28th day from ICU admission (aOR, 95% CI)    | 0.96 (0.82-1.14) | 0.98 (0.86-1.12) | 0.98 (0.83-1.16) |

**Abbreviations:** aHR, adjusted hazard ratio; aOR adjusted odds ratio; BSI, bloodstream infection; CHX, chlorhexidine; CI, confidence interval; MDRGNB, multidrug resistant Gram-negative bacteria; SDD, selective digestive decontamination; SOD, selective oropharyngeal decontamination.

- a) all models accounted for clustering using a fixed effect on ICU and a random effect on study period (13 ICUs x 4 study periods) and were adjusted for age, gender, the Charlson comorbidity index, APACHE II or SAPS II score, admission type, antibiotic use on ICU admission, location before ICU admission (in both propensity score and final models) and mean hand hygiene compliance per study period (only in final models).
- b) multidrug resistant Gram-negative bacteria are defined in Supplementary eTable 2.

**eTable 15.** Results for Competing End Points for Primary and Secondary Outcomes

| Study period (comparisons with baseline period)                  | CHX              | SOD              | SDD              |
|------------------------------------------------------------------|------------------|------------------|------------------|
| Competing events                                                 | CSHR (95% CI)    | CSHR (95% CI)    | CSHR (95% CI)    |
| ICU-acquired BSI with multidrug resistant Gram-negative bacteria |                  |                  |                  |
| ICU discharge                                                    | 0.97 (0.87-1.07) | 1.00 (0.90-1.12) | 0.99 (0.88-1.11) |
| Death in ICU                                                     | 1.02 (0.90-1.15) | 0.99 (0.87-1.12) | 0.94 (0.80-1.09) |
| ICU-acquired BSI with highly-resistant micro-organisms           |                  |                  |                  |
| ICU discharge                                                    | 0.97 (0.87-1.07) | 1.00 (0.90-1.12) | 0.99 (0.88-1.11) |
| Death in ICU                                                     | 1.01 (0.89-1.15) | 0.98 (0.86-1.12) | 0.92 (0.79-1.08) |
| ICU-acquired BSI with any pathogen                               |                  |                  |                  |
| ICU discharge                                                    | 0.96 (0.87-1.06) | 1.01 (0.91-1.12) | 0.98 (0.87-1.09) |
| Death in ICU                                                     | 1.00 (0.88-1.14) | 0.97 (0.85-1.11) | 0.93 (0.79-1.09) |
| Mortality in ICU                                                 |                  |                  |                  |
| ICU discharge                                                    | 0.97 (0.88-1.08) | 1.01 (0.91-1.12) | 1.00 (0.90-1.11) |
| Mortality in hospital                                            |                  |                  |                  |
| Hospital discharge                                               | 1.03 (0.93-1.14) | 1.10 (1.02-1.18) | 1.03 (0.96-1.11) |

**Abbreviations:** CSHR: cause specific hazard ratio; CHX, chlorhexidine; CI: confidence interval; ICU: intensive care unit; SDD, selective digestive decontamination; SOD, selective oropharyngeal decontamination.
