# Supplementary material
Source: PubMed Central journal article supplement (PMC6583563)
Supplement: jama-320-2087-s003.pdf [file jama-320-2087-s003.pdf]

## **Data Sharing Statement**

Wittekamp. Decontamination Strategies and Bloodstream Infections With Antibiotic-Resistant Microorganisms in Ventilated Patients. *JAMA*. Published October 22, 2018. 10.1001/jama.2018.13765

### **Data**

**Data available:** No

### **Additional Information**

**Explanation for why data not available:** upon request
